# Supplementary material for: From Foxtail Millet Husk (Waste) to Bioactive Phenolic Extracts Using Deep Eutectic Solvent Extraction and Evaluation of Antioxidant, Acetylcholinesterase, and α-Glucosidase Inhibitory Activities
Source: MDPI journal article supplement (doi:10.3390/foods12061144), 2023-03-08
Supplement: s1 [file s1]

jia chun -2ji 12 (21.762)

4: Daughters of 329ES-  
2.10e6

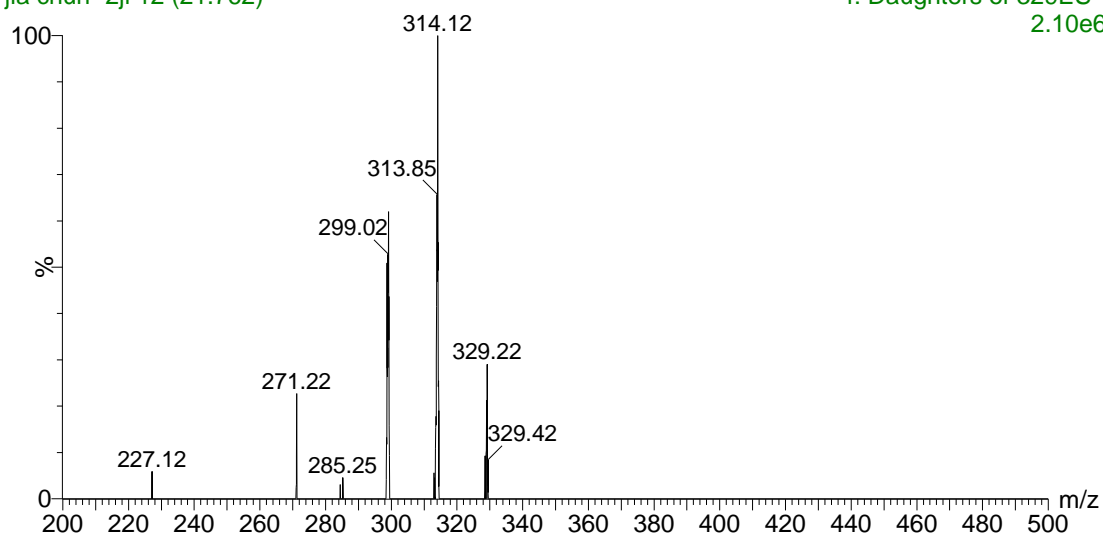

ia1 26000 (21.670)

2: Diode Array  
8.232e-1

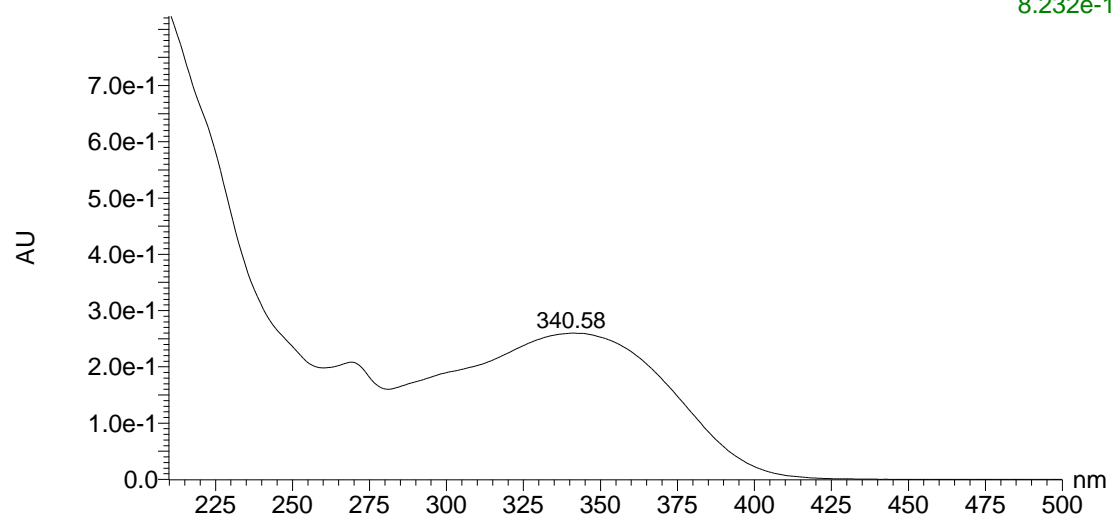

Figure S2. The MS/MS fragments and UV spectrum of 3,7-dimethylquercetin.
