# Supplementary figures and images for: From Foxtail Millet Husk (Waste) to Bioactive Phenolic Extracts Using Deep Eutectic Solvent Extraction and Evaluation of Antioxidant, Acetylcholinesterase, and α-Glucosidase Inhibitory Activities
Source: MDPI journal article supplement (doi:10.3390/foods12061144), 2023-03-08

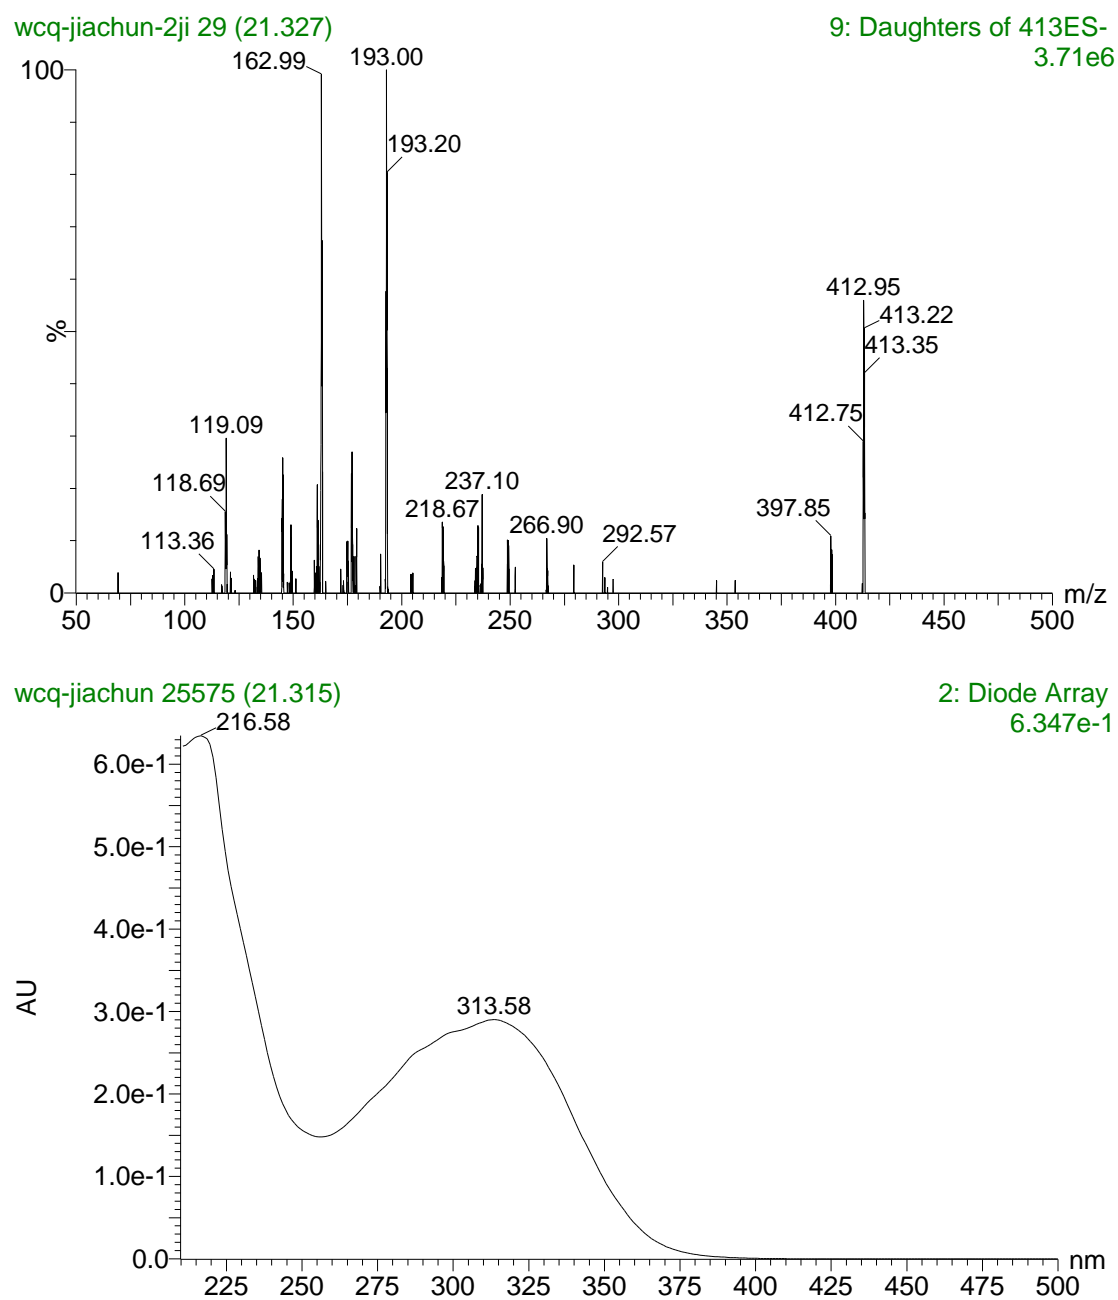

Figure S1. The MS/MS fragments and UV spectrum of 1-*O*-feruloyl-3-*O*-*p*-coumaroylglycerol.

Supplement: s1 [file s1]
